# Supplementary material
Source: PubMed Central journal article supplement (PMC2943514)
Supplement: NIHMS208956-supplement-9.pdf [file NIHMS208956-supplement-9.pdf]

# Figure S1

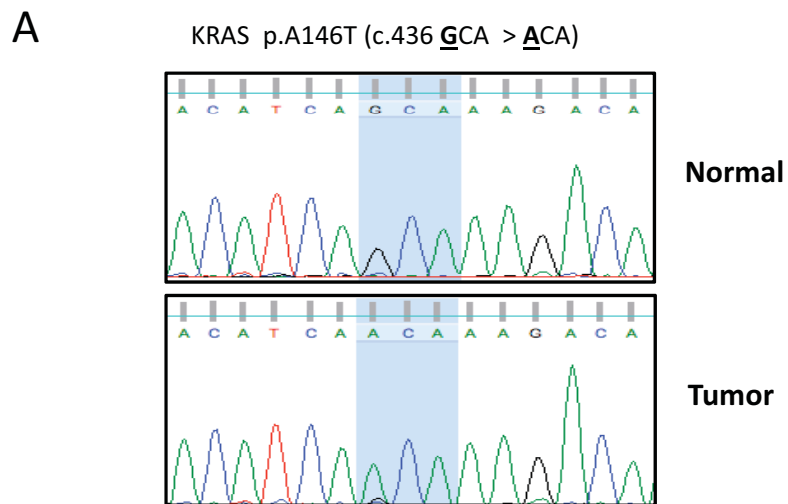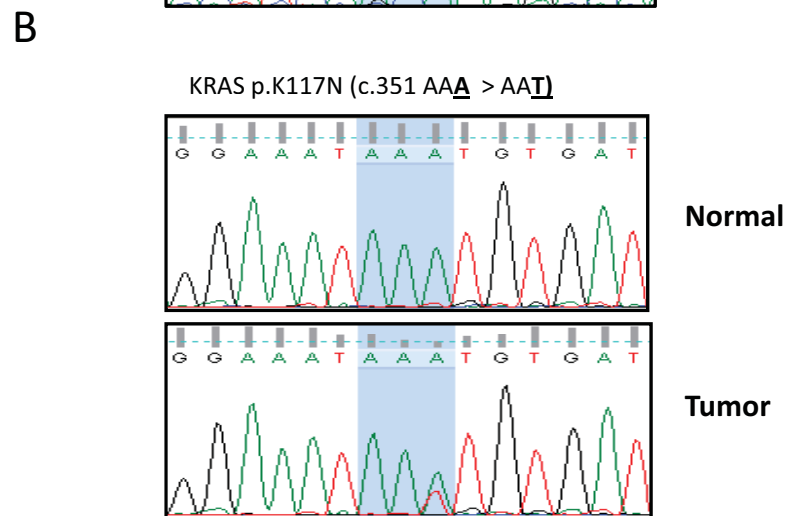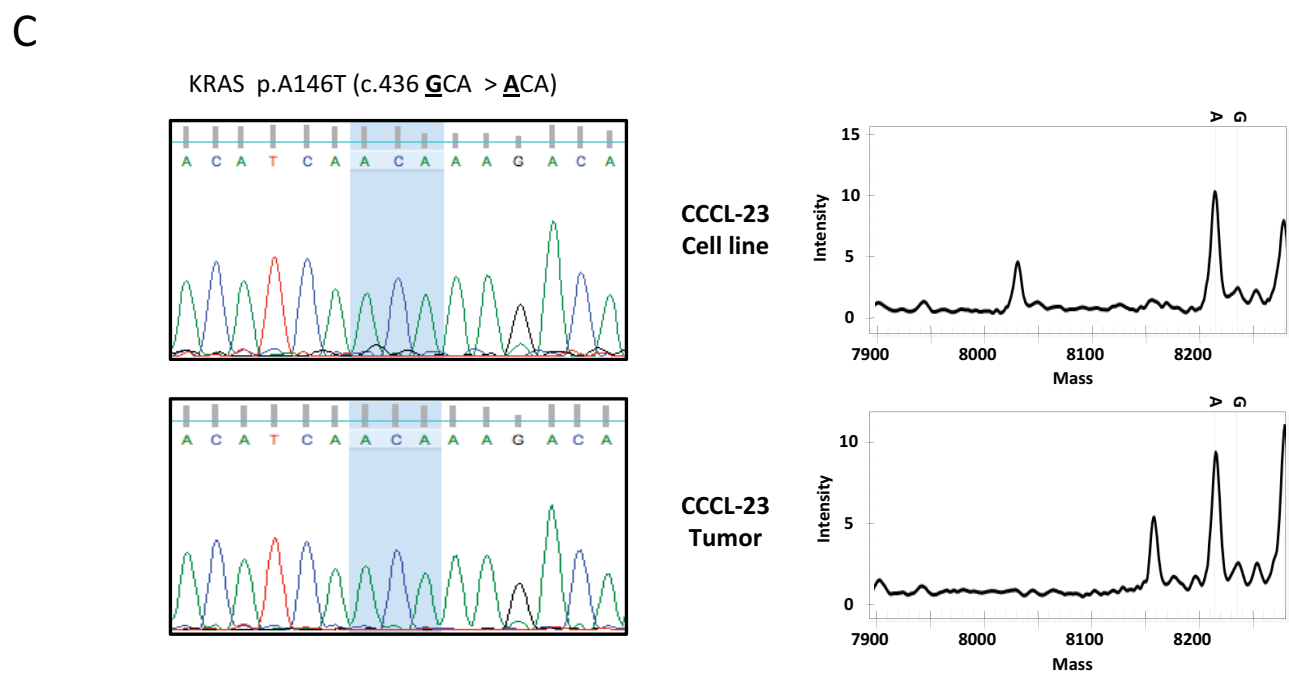

Figure S2

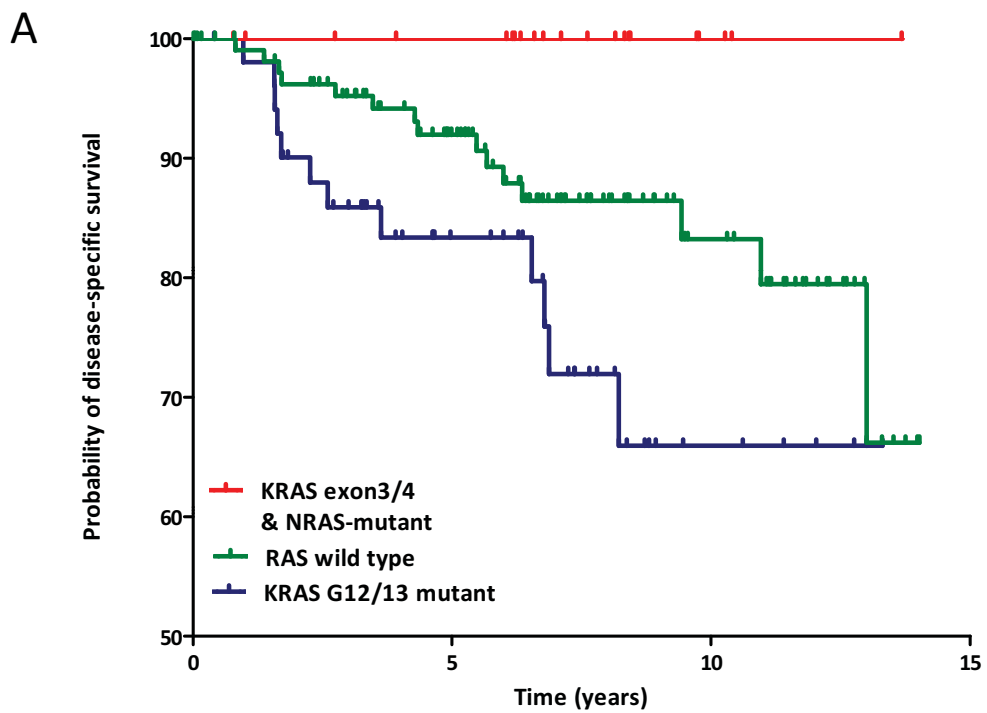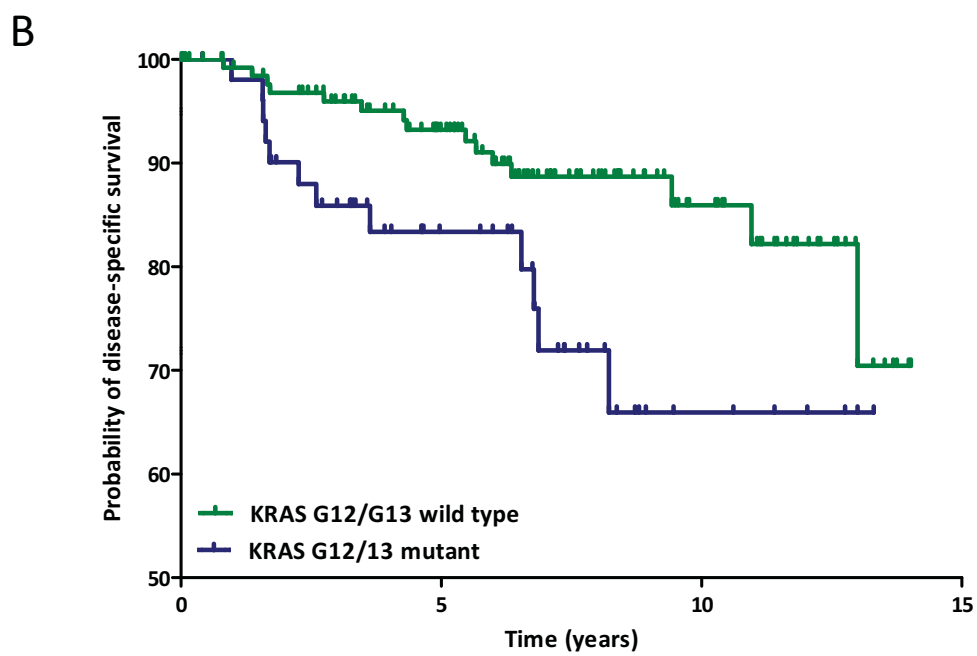

Figure S3

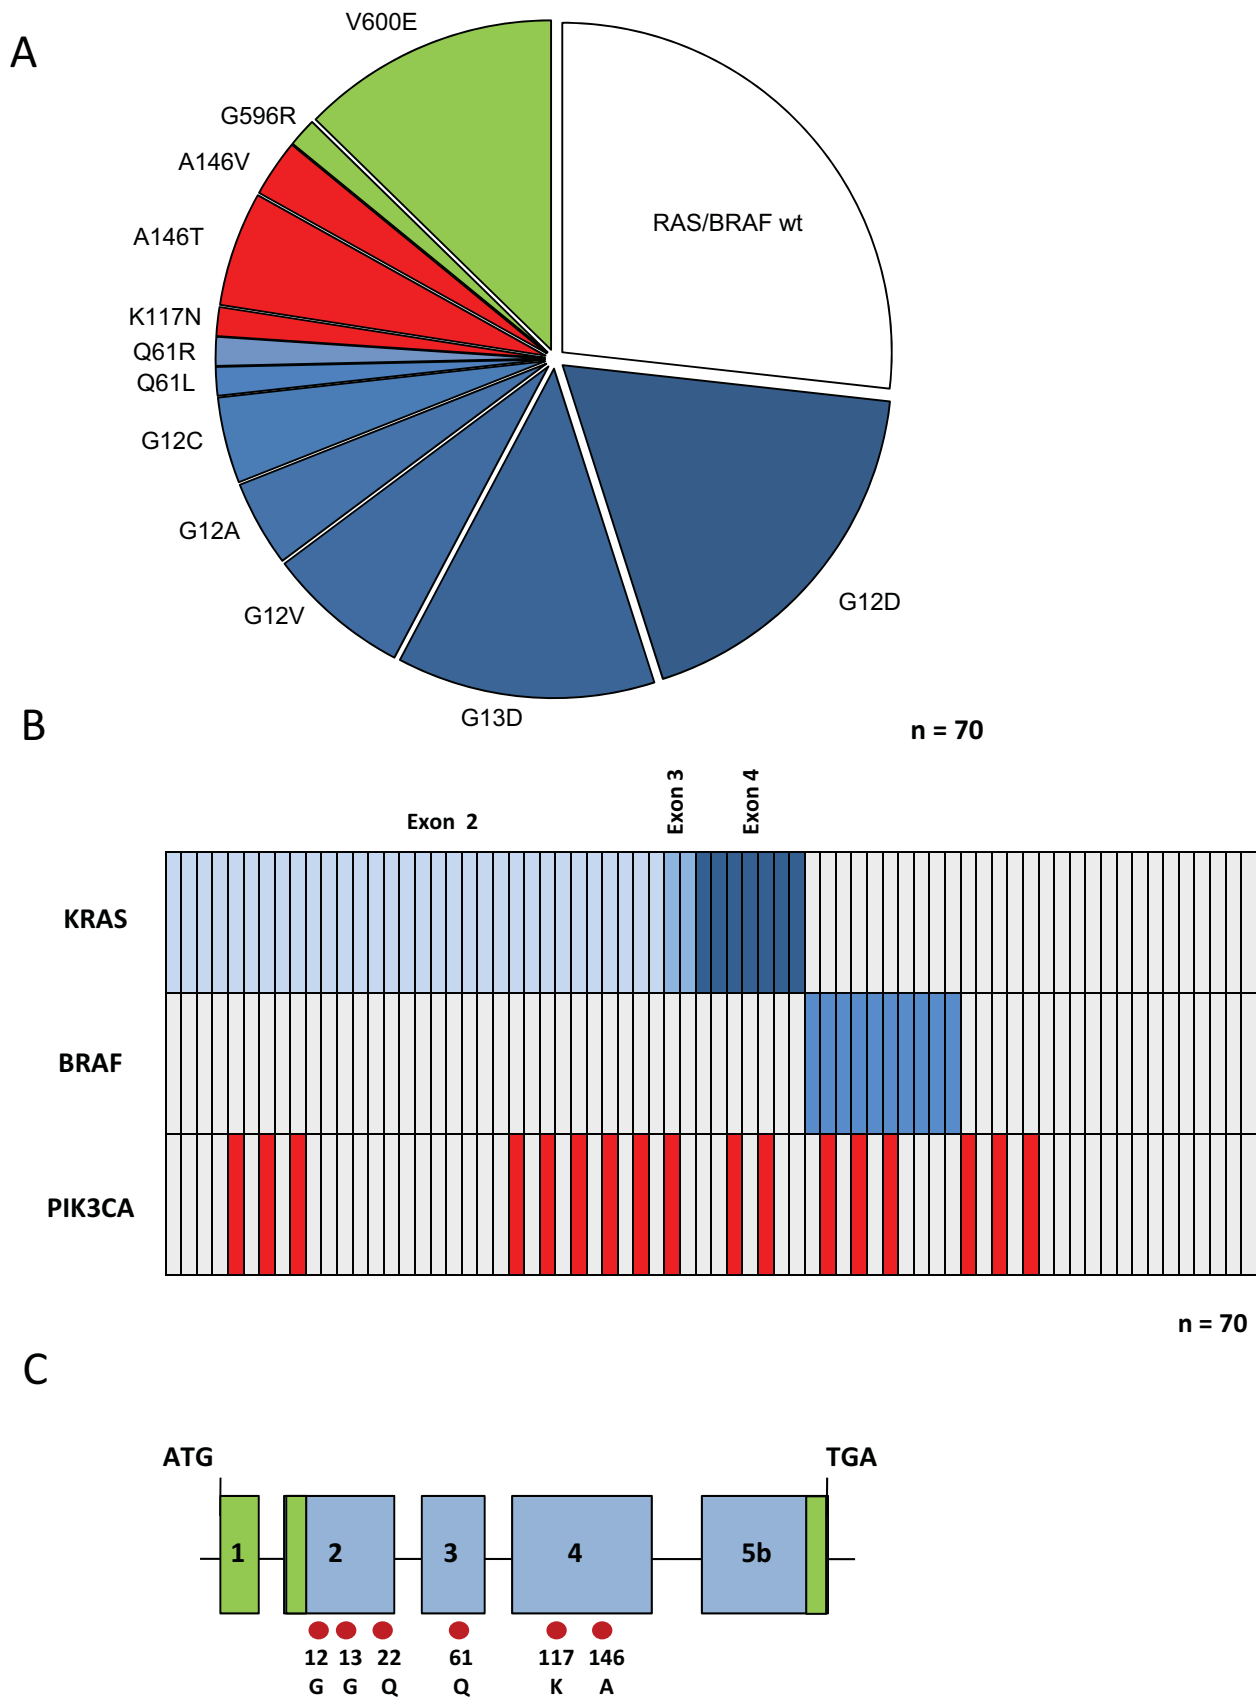

# Table S1

**Table S1. KRAS K117N & A146T/V mutations in patients for which annotated clinical data was available**

| Tissue Site   | KRAS  | PIK3CA | TP53       | Sex | Age | Primary Location | Stage | Primary Size | FUP Status | FUP Interval (yrs) | MSI Status |
|---------------|-------|--------|------------|-----|-----|------------------|-------|--------------|------------|--------------------|------------|
| polyp         | A146T | wt     | wt         | M   | 67  | Rectum           |       |              |            |                    | MSS        |
| polyp         | A146T | wt     | wt         | M   | 72  | Ascending        |       |              |            |                    | MSS        |
| polyp         | A146T | wt     | wt         | M   | 77  | Ascending        |       |              |            |                    | MSS        |
| primary colon | A146T | wt     | R213*      | F   | 68  | Rectum           | I     | 3.5          | NED        | 10.3               | MSS        |
| primary colon | A146T | wt     | wt         | F   | 61  | Rectum           | I     | 5.0          | NED        | 6.6                | MSS        |
| primary colon | A146T | M1043I | wt         | M   | 85  | Cecum            | I     | 3.5          | DOC        | 13.7               | MSI        |
| primary colon | A146T | wt     | wt         | M   | 69  | Cecum            | I     | 5.0          | NED        | 6.2                | MSS        |
| primary colon | K117N | H1047R | wt         | M   | 75  | Cecum            | I     | 6            | NED        | 1.0                | MSI        |
| primary colon | A146T | wt     | R282W      | F   | 73  | Sigmoid          | II    | 5.0          | NED        | 6.3                | MSS        |
| primary colon | A146T | wt     | wt         | M   | 67  | Rectum           | II    | 4.5          | NED        | 7.1                | MSS        |
| primary colon | A146T | wt     | R273H      | M   | 70  | Cecum            | II    | 6.0          | NED        | 0.8                | MSS        |
| primary colon | A146V | wt     | H214R      | F   | 63  | Transverse       | II    | 4.2          | NED        | 6.2                | MSS        |
| primary colon | A146T | wt     | wt         | F   | 41  | Transverse       | III   | 4.5          | NED        | 10.4               | MSS        |
| primary colon | K117N | wt     | wt         | M   | 57  | Rectum           | III   | 4.0          | NED        | 7.6                | MSS        |
| primary colon | A146T | wt     | wt         | F   | 70  | Transverse       | IV    | 5.0          | DOD        | 1.8                | MSS        |
| primary colon | A146T | wt     | wt         | F   | 67  | Sigmoid          | IV    | 3.3          | DOD        | 2.6                | MSS        |
| primary colon | K117N | wt     | wt         | F   | 75  | Sigmoid          | IV    | 3.0          | DOD        | 0.8                | MSS        |
| liver met     | A146T | wt     | wt         | F   | 50  | Sigmoid          | IV    | 4.5          | NED        | 13.0               | N/A        |
| liver met     | A146T | wt     | S20L/R337C | F   | 59  | Sigmoid          | IV    | N/A          | NED        | 12.5               | N/A        |
| liver met     | A146T | wt     | R342*      | M   | 59  | Sigmoid          | N/A   | N/A          | NED        | 19.5               | N/A        |
| liver met     | A146T | wt     | R306*      | F   | 75  | Rectum           | IV    | 5.5          | NED        | 1.7                | N/A        |

## Table S2

**Table S2. List of KRAS, BRAF and PIK3CA mutations in 70 colorectal cancer cell lines.**

| Cell Lines | KRAS  | BRAF  | PIK3CA | Source |
|------------|-------|-------|--------|--------|
| GEO        | G12A  | wt    | wt     | LICR   |
| C84        | G12A  | wt    | wt     | CRUK   |
| SW1116     | G12A  | wt    | wt     | ATCC   |
| RW7213     | G12C  | wt    | wt     | LICR   |
| SW837      | G12C  | wt    | wt     | LICR   |
| Gp5d       | G12D  | wt    | H1047L | LICR   |
| LS174T     | G12D  | wt    | H1047R | LICR   |
| LS180      | G12D  | wt    | H1047R | LICR   |
| ALA        | G12D  | wt    | wt     | LICR   |
| CCCL-2     | G12D  | wt    | wt     | MSKCC  |
| CCCL-11    | G12D  | wt    | wt     | MSKCC  |
| CCCL-13    | G12D  | wt    | wt     | MSKCC  |
| Isreco1    | G12D  | wt    | wt     | LICR   |
| Isreco2    | G12D  | wt    | wt     | LICR   |
| Isreco3    | G12D  | wt    | wt     | LICR   |
| LS513      | G12D  | wt    | wt     | LICR   |
| SNU-C2B    | G12D  | wt    | wt     | LICR   |
| TC71       | G12D  | wt    | wt     | LICR   |
| CCCL-3     | G12V  | wt    | wt     | MSKCC  |
| SKCO-1     | G12V  | wt    | wt     | LICR   |
| SW403      | G12V  | wt    | wt     | LICR   |
| SW480      | G12V  | wt    | wt     | LICR   |
| SW620      | G12V  | wt    | wt     | LICR   |
| T84        | G13D  | wt    | E542K  | LICR   |
| DLD-1      | G13D  | wt    | E545K  | LICR   |
| HCT-15     | G13D  | wt    | E545K  | LICR   |
| HCT-8      | G13D  | wt    | E545K  | LICR   |
| HCT116     | G13D  | wt    | H1047R | LICR   |
| CCCL-19    | G13D  | wt    | wt     | MSKCC  |
| CCCL-28    | G13D  | wt    | wt     | MSKCC  |
| LoVo       | G13D  | wt    | wt     | LICR   |
| NCI-H747   | G13D  | wt    | wt     | ATCC   |
| SW948      | Q61L  | wt    | E542K  | LICR   |
| RW2982     | Q61R  | wt    | wt     | LICR   |
| C125PM     | K117N | wt    | wt     | CRUK   |
| HCC2998    | A146T | wt    | wt     | LICR   |
| LS1034     | A146T | wt    | wt     | ATCC   |
| CCCL-18    | A146T | wt    | E542K  | MSKCC  |
| CCCL-23    | A146T | wt    | E545K  | MSKCC  |
| C80        | A146V | wt    | wt     | CRUK   |
| SW1222     | A146V | wt    | wt     | ATCC   |
| NCI-H508   | wt    | G596R | wt     | ATCC   |
| RKO        | wt    | V600E | H1047R | LICR   |
| Vaco-5     | wt    | V600E | H1047R | LICR   |
| HT29       | wt    | V600E | P449T* | LICR   |
| Co-115     | wt    | V600E | wt     | LICR   |
| COLO-201   | wt    | V600E | wt     | LICR   |
| COLO-205   | wt    | V600E | wt     | LICR   |
| LS411N     | wt    | V600E | wt     | ATCC   |
| SW1417     | wt    | V600E | wt     | LICR   |
| WiDR       | wt    | V600E | wt     | LICR   |
| CCCL-10    | wt    | wt    | E545K  | MSKCC  |
| CCCL-6     | wt    | wt    | H1047R | MSKCC  |
| CoCM-1     | wt    | wt    | R1023Q | MSKCC  |
| C2BBe1     | wt    | wt    | wt     | ATCC   |
| Caco-2     | wt    | wt    | wt     | ATCC   |
| C32        | wt    | wt    | wt     | CRUK   |
| CCCL-14    | wt    | wt    | wt     | MSKCC  |
| CCCL-20    | wt    | wt    | wt     | MSKCC  |
| CCCL-21    | wt    | wt    | wt     | MSKCC  |
| CCCL-26    | wt    | wt    | wt     | MSKCC  |
| CCCL-30    | wt    | wt    | wt     | MSKCC  |
| COLO-320   | wt    | wt    | wt     | LICR   |
| DIFI       | wt    | wt    | wt     | LICR   |
| HCA7       | wt    | wt    | wt     | LICR   |
| HTB135     | wt    | wt    | wt     | ATCC   |
| KM12       | wt    | wt    | wt     | NCI    |
| LIM1215    | wt    | wt    | wt     | LICR   |
| SW48       | wt    | wt    | wt     | LICR   |
| V9P        | wt    | wt    | wt     | LICR   |

\*From COSMIC ([http://www.sanger.ac.uk/perl/genetics/CGP/core\\_line\\_viewer?action=sample&id=905939](http://www.sanger.ac.uk/perl/genetics/CGP/core_line_viewer?action=sample&id=905939)); MSKCC-Memorial Sloan-Kettering Cancer Center, New York; LICR-Ludwig Institute for Cancer Research, Melbourne; CRUK-Cancer Research, UK; ATCC-American Type Culture Collection, Manassas; NCI-National Cancer Institute, Bethesda.

# Table S3

**Table S3. Focal regions of copy number gain and loss identified by RAE Analysis of 128 colorectal tumors.**

| Locus                 | Region (Mb)     | Effective frequency† | Q-value‡  | Number of genes§ | Genetic element of interest¶                      |
|-----------------------|-----------------|----------------------|-----------|------------------|---------------------------------------------------|
| <b>Amplifications</b> |                 |                      |           |                  |                                                   |
| 7p22.3-p21.3*         | 0.140-9.112     | 50 (3.1)             | <4.86E-08 | 72,2             | CARD11,MMD2,FBXL18,PMS2,RPA3,ICA1,CHST12,PDGFA    |
| 7q32.3-q34*           | 131.599-141.403 | 41.4 (2.3)           | <4.86E-08 | 62,1             | TRIM24,HIPK2,DGKI,BRAF,CREB3L2                    |
| 7q36.1-q36.3*         | 152.011-158.811 | 39.8 (7)             | <4.86E-08 | 20,2             | hsa-mir-153-2,hsa-mir-595,SHH,UBE3C,PAXIP1        |
| 8q24.12 *             | 120.518-122.057 | 50 (10.2)            | <4.86E-08 | 8,0              | near MYC; ENPP2,COL14A1,SNTB1                     |
| 9p22.1                | 19.286-19.331   | 21.1 (1.6)           | 0.0902    | 1,0              | DENND4C                                           |
| 12p13.33*             | 0.544-0.551     | 21.1 (0.8)           | 0.0972    | 1,0              | -                                                 |
| 12p13.33 *            | 0.939-1.472     | 21.9 (0.8)           | 0.0642    | 1,0              | ERC1                                              |
| 12p13.33-p13.31*      | 1.926-8.201     | 25.8 (2.3)           | 0.0042    | 88,2             | CACNA1C,NTF3,ING4,ZNF384,PTPN6,GDF3,CCND2,ZNF384  |
| 13q12.13-q12.2*       | 26.194-27.744   | 56.2 (15.6)          | <4.86E-08 | 15,0             | FLT3,CDX2,USP12; near CDK8                        |
| 13q14.11-q21.1*       | 40.932-56.650   | 57 (11.7)            | <4.86E-08 | 72,2             | hsa-mir-16-1,hsa-mir-15a,HTR2A,RB1,LCP1           |
| 16p11.2               | 27.812-28.187   | 21.1 (0.8)           | 0.0933    | 2,0              | XPO6                                              |
| 16p11.2               | 28.774-29.090   | 21.1 (0.8)           | 0.0926    | 7,0              | CD19,SH2B                                         |
| 20p13-p12.3*          | 0.590-6.362     | 39.1 (12.5)          | <4.86E-08 | 73,1             | -                                                 |
| 20q11.21-q12*         | 29.592-39.033   | 68 (25.8)            | <4.86E-08 | 110,2            | MYLK2,C20orf160,HCK,KIF3B,DNMT3B,DHX35,MAFB,NDRG3 |
| <b>Deletions</b>      |                 |                      |           |                  |                                                   |
| 3p14.2                | 60.448-60.462   | 18 (6.2)             | 0.1308    | 1,0              | FHIT                                              |
| 4q22.1*               | 92.062-92.096   | 27.3 (0.8)           | 1.83E-05  | 0,0              | -                                                 |
| 4q35.2*               | 189.387-189.417 | 28.1 (2.3)           | 6.13E-06  | 0,0              | -                                                 |
| 5q14.1                | 80.703-81.063   | 19.5 (0.8)           | 0.1172    | 2,0              | SSBP2                                             |
| 5q14.2                | 81.609-82.016   | 19.5 (0.8)           | 0.1171    | 2,0              | -                                                 |
| 5q14.3                | 83.148-91.578   | 21.9 (0.8)           | 0.0203    | 13,1             | hsa-mir-9-2,EDIL3,MEF2C,COX7C                     |
| 5q15                  | 93.191-93.309   | 19.5 (0.8)           | 0.1152    | 1,0              | -                                                 |
| 5q21.1-q22.3          | 97.997-114.112  | 26.6 (5.5)           | 0.0123    | 31,0             | APC,FBXL17,EFNA5                                  |
| 5q23.1                | 115.292-116.096 | 19.5 (0.8)           | 0.1188    | 3,0              | SEMA6A                                            |
| 5q23.1                | 120.408-120.477 | 18.8 (1.6)           | 0.1430    | 0,0              | -                                                 |
| 6q26                  | 162.762-162.790 | 19.5 (1.6)           | 0.1472    | 1,0              | PARK2                                             |
| 8p11.21               | 41.074-41.131   | 18.8 (0)             | 0.1364    | 0,0              | SFRP1                                             |
| 10q23.2               | 89.459-89.573   | 25 (0.8)             | 0.0043    | 2,0              | PAPSS2 (near PTEN)                                |
| 10q25.1               | 107.961-111.569 | 21.1 (0.8)           | 0.0609    | 1,0              | SORCS1                                            |
| 10q25.2               | 114.214-114.844 | 20.3 (0.8)           | 0.1014    | 2,0              | TCF7L2                                            |
| 16p13.2               | 6.429-6.883     | 34.4 (12.5)          | 4.10E-06  | 1,0              | A2BP1                                             |
| 17p13.1-p11.2*        | 11.090-16.778   | 48.4 (1.6)           | <7.34E-08 | 32,1             | hsa-mir-744,MAP2K4                                |
| 18p11.32-p11.31*      | 0.004-3.647     | 48.4 (1.6)           | <7.34E-08 | 21,0             | -                                                 |
| 18p11.21*             | 11.126-12.656   | 49.2 (1.6)           | <7.34E-08 | 9,0              | IMPA2,CIDEA                                       |
| 18q21.1-q21.2*        | 45.118-50.105   | 60.2 (7)             | <7.34E-08 | 21,0             | SMAD4,DCC                                         |

† Single-copy gain, amplification in parenthesis; otherwise heterozygous and homozygous deletion

‡ False-discovery corrected p-value

§ Number of genes (RefSeq) and microRNAs (hg18)

\* See supplementary table 4 (arm-length events)

¶ Genetic elements of interest selected from COSMIC, Cancer Gene Census, or other evidence

**Notes:**

Regional boundaries of the 10q23.2 deletion (85.796-107.064) span 200 additional genes and 7 microRNAs: hsa-mir-346, hsa-mir-107, hsa-mir-607, hsa-mir-608, hsa-mir-146b, hsa-mir-936, hsa-mir-609, WNT8B, MINPP1, TNKS2, PLCE1, BMPR1A, FAS, TLX1, NFKB2, SUFU, GHITM, PCDH21, GRID1, OPN4, SNCG, C10orf116, GLUD1, ATAD1, C10orf59, STAMBPL1, CH25H, LIPA, IFIT1, PANK1, CPEB3, KIF11, HHEX, CYP26A1, CEP55, RBP4, LGI1, CYP2C18, CYP2C19, CYP2C9, CYP2C8, SORBS1, ALDH18A1, ENTPD1, DNNT, PIK3AP1, SLIT1, ARHGAP19, PGAM1, MMS19, SFRP5, CRTAC1, HPSE2, CNNM1, GOT1, ENTPD7, COX15, CUTC, CHUK, PKD2L1, SCD, NDUFB8, HIF1AN, BTRC, POLL, FGF8, PPRC1, PSD, FBXL15, ACTR1A, CYP17A1, CNNM2, NT5C2, INA, TAF5, PDCC11, NEURL, SH3PXD2A, COL17A1, GSTO2, SORCS3, C10orf99, LRRC22, LRRC21, RGR, KIAA1128, WAPAL, LDB3, MMRN2, KIAA1975, FAM35A, FAM22A, FAM22D, LIPL1, LIPF, LIPL2, LIPN, ANKRD22, ACTA2, IFIT2, IFIT3, IFIT1L, IFIT5, SLC16A12, MPHOSPH1, HTR7, RPP30, ANKRD1, PCGF5, HECTD2, PPP1R3C, FGFBP3, BTAFA1, MARCH5, IDE, EXOC6, CYP26C1, FER1L3, GPR120, PDE6C, C10orf4, TMEM20, NOC3L, TBC1D12, HELLS, C10orf129, PDLIM1, TCTN3, C10orf130, CCNJ, ZNF518, BLNK, TMEM10, TLL2, SMBP, LCOR, C10orf12, FRAT1, FRAT2, KIAA0690, EXOSC1, ZDHHC16, UBTD1, ANKRD2, C10orf65, C10orf62, C10orf83, PI4KII, AVP11, ZFYVE27, C10orf132, C10orf28, LOXL4, C10orf33, HPS1, NKX2-3, SLC25A28, ABCC2, DNMBP, CPN1, ERLIN1, CWF19L1, BLOC1S2, SEC31L2, PAX2, C10orf6, SEMA4G, MRPL43, PEO1, LZTS2, PDZD7, SFXN3, KAZALD1, TD1, LBX1, RP11-529I10.4, FBXW4, NPM3, MGEA5, KCNIP2, C10orf76, HPS6, LDB1, NOLC1, ELOVL3, PITX3, GBF1, CUEDC2, C10orf95, C10orf77, TRIM8, ARL3, SFXN2, C10orf26, C10orf32, A53MT, PCGF6, USMG5, FAM26B, FAM26C, OBF1, SLK, C10orf78, C10orf79, GSTO1, KIAA1754, C10orf80

## Table S4

**Table S4. Arm length events identified by array CGH in 128 colorectal tumors.**

| <b>Alteration</b> | <b>Arm(s)*</b> | <b>Q-value</b> | <b>Frequency(%)§</b> |
|-------------------|----------------|----------------|----------------------|
| Gain              | 7p             | <4.86E-08      | 47.7                 |
| Gain              | 7q             | <4.86E-08      | 37.5                 |
| Gain              | 8q             | <4.86E-08      | 46.1                 |
| Gain              | 12p            | <4.86E-08      | 21.9                 |
| Gain              | 13q            | <4.86E-08      | 54.7                 |
| Gain              | 20p            | <4.86E-08      | 35.9                 |
| Gain              | 20q            | <4.86E-08      | 65.6                 |
| Loss              | 1p             | <7.34E-08      | 23.4                 |
| Loss              | 4p             | 3.38E-07       | 28.1                 |
| Loss              | 4q             | <7.34E-08      | 25                   |
| Loss              | 8p             | <7.34E-08      | 36.7                 |
| Loss              | 14q            | <7.34E-08      | 21.9                 |
| Loss              | 15q            | <7.34E-08      | 29.7                 |
| Loss              | 17p            | <7.34E-08      | 44.5                 |
| Loss              | 18p            | <7.34E-08      | 47.7                 |
| Loss              | 18q            | <7.34E-08      | 57.8                 |
| Loss              | 21q            | <7.34E-08      | 19.5                 |
| Loss              | 22q            | 2.44E-05       | 20.3                 |

\* Contiguous region of significant alteration spanning >50% of the chromosome arm by genomic coverage

§ Frequencies calculated from tumors whose median copy number alteration status for the arm was either single-copy gain or heterozygous loss

## Table S5

**Table S5. List of mutations screened using the colorectal Sequenom assay panel.**

| <b>KRAS</b> | <b>NRAS</b> | <b>BRAF</b> | <b>PIK3CA</b> | <b>MEK1</b> |
|-------------|-------------|-------------|---------------|-------------|
| G12V        | G12V        | G466E       | K111N         | K57N        |
| G12D        | G12D        | G466V       | C420R         |             |
| G12A        | G12A        | G466A       | P539R         |             |
| G12S        | G13D        | G466R       | E542K         |             |
| G12R        | G13A        | G469E       | E542G         |             |
| G12C        | G13V        | G469A       | E542V         |             |
| G13D        | G13R        | G469V       | E542Q         |             |
| G13A        | A18T        | G469R       | E545K         |             |
| G13V        | Q61K        | V600E       | E545G         |             |
| G13S        | Q61E        | V600K       | E545A         |             |
| G13R        | Q61P        | V600R       | E545D         |             |
| G13C        | Q61R        | V600M       | Q546K         |             |
| L19F        | Q61L        | K601E       | Q546E         |             |
| Q22K        | Q61H        | L618S       | Q546P         |             |
| Q22R        |             |             | Q546R         |             |
| A59T        |             |             | H1047R        |             |
| A59E        |             |             | H1047L        |             |
| Q61K        |             |             | H1047Y        |             |
| Q61E        |             |             |               |             |
| Q61P        |             |             |               |             |
| Q61R        |             |             |               |             |
| Q61L        |             |             |               |             |
| Q61H        |             |             |               |             |
| A146T       |             |             |               |             |
| A146V       |             |             |               |             |
| A146P       |             |             |               |             |



# Table S6

**Table S6. SNPs included in the HapMap Sequenom assay**

| Chromosome | dBSNP id   | Population Count | Populations and Genotype Counts                                                                                                                                                                                                                                           |
|------------|------------|------------------|---------------------------------------------------------------------------------------------------------------------------------------------------------------------------------------------------------------------------------------------------------------------------|
| chrX       | rs28593253 | 3                | US_African-30-trios[CT:45][CC:26][TT:28], US_Gujarati[CT:45][CC:30][TT:24], Maasai_Kenyan-60-trios[CT:51][CC:25][TT:23]                                                                                                                                                   |
| chrX       | rs6645103  | 3                | CEPH-60-trios[CT:45][CC:31][TT:22], US_Chinese[CT:51][CC:25][TT:22], US_Gujarati[CT:47][CC:25][TT:26]                                                                                                                                                                     |
| chr13      | rs5973824  | 6                | US_African-30-trios[AG:50][AA:25][GG:23], CEPH-60-trios[AG:50][AA:26][GG:23], Han_Chinese[AG:50][AA:24][GG:25], US_Chinese[AG:50][AA:24][GG:25], US_Chinese[AG:49][AA:24][GG:26], Japanese[AG:47][AA:29][GG:23], Italian[AG:51][AA:23][GG:24]                             |
| chr13      | rs630706   | 6                | US_African-30-trios[CT:47][CC:26][TT:25], CEPH-60-trios[CT:46][CC:28][TT:25], Han_Chinese[CT:52][CC:24][TT:23], US_Chinese[CT:48][CC:24][TT:27], Luhya_Kenyan[CT:46][CC:30][TT:22], Maasai_Kenyan-60-trios[CT:50][CC:23][TT:26]                                           |
| chr13      | rs1927014  | 6                | US_African-30-trios[CT:49][CC:25][TT:25], CEPH-60-trios[CT:46][CC:25][TT:28], Han_Chinese[CT:51][CC:24][TT:24], Luhya_Kenyan[CT:46][CC:22][TT:30], Maasai_Kenyan-60-trios[CT:50][CC:26][TT:23], Yoruba-60-trios[CT:46][CC:23][TT:30]                                      |
| chr13      | rs7326426  | 6                | Han_Chinese[CT:49][CC:24][TT:25], US_Chinese[CT:52][CC:22][TT:24], US_Gujarati[CT:54][CC:22][TT:22], Japanese[CT:51][CC:24][TT:24], Luhya_Kenyan[CT:45][CC:27][TT:27], Yoruba-60-trios[CT:52][CC:23][TT:24]                                                               |
| chr12      | rs2433651  | 7                | US_African-30-trios[AG:50][AA:25][GG:23], US_Chinese[AG:51][AA:22][GG:25], US_Gujarati[AG:48][AA:22][GG:28], Japanese[AG:48][AA:26][GG:24], Luhya_Kenyan[AG:45][AA:27][GG:26], Italian[AG:48][AA:25][GG:25], Yoruba-60-trios[AG:47][AA:22][GG:30]                         |
| chr12      | rs7297243  | 7                | US_African-30-trios[AG:49][AA:23][GG:26], CEPH-60-trios[AG:47][AA:27][GG:24], Han_Chinese[AG:47][AA:24][GG:28], US_Chinese[AG:47][AA:25][GG:27], Japanese[AG:50][AA:23][GG:26], Luhya_Kenyan[AG:46][AA:28][GG:24], Italian[AG:45][AA:31][GG:23]                           |
| chr11      | rs10899035 | 7                | US_African-30-trios[CT:47][CC:26][TT:25], CEPH-60-trios[CT:51][CC:24][TT:24], Han_Chinese[CT:47][CC:26][TT:24], US_Chinese[CT:46][CC:28][TT:24], US_Gujarati[CT:49][CC:26][TT:24], Luhya_Kenyan[CT:51][CC:22][TT:25], Yoruba-60-trios[CT:48][CC:28][TT:23]                |
| chr10      | rs1624525  | 7                | US_African-30-trios[GT:54][GG:22][TT:22], Han_Chinese[GT:45][GG:24][TT:30], Japanese[GT:46][GG:23][TT:30], Luhya_Kenyan[GT:46][GG:28][TT:24], US_Mexican-30-trios[GT:46][GG:22][TT:30], Maasai_Kenyan-60-trios[GT:53][GG:22][TT:23], Yoruba-60-trios[GT:45][GG:22][TT:31] |
| chr17      | rs4617924  | 6                | US_African-30-trios[AC:47][AA:28][CC:23], CEPH-60-trios[AC:49][AA:23][CC:27], Luhya_Kenyan[AC:48][AA:22][CC:28], US_Mexican-30-trios[AC:46][AA:30][CC:22], Maasai_Kenyan-60-trios[AC:46][AA:29][CC:23], Yoruba-60-trios[AC:48][AA:26][CC:24]                              |
| chr17      | rs2619118  | 6                | CEPH-60-trios[CT:52][CC:23][TT:23], Han_Chinese[CT:47][CC:25][TT:26], US_Chinese[CT:48][CC:25][TT:25], US_Gujarati[CT:46][CC:26][TT:26], Japanese[CT:50][CC:23][TT:25], Italian[CT:46][CC:25][TT:27]                                                                      |
| chr16      | rs9928312  | 6                | US_African-30-trios[AG:46][AA:25][GG:25], Han_Chinese[AG:46][AA:24][GG:29], US_Chinese[AG:51][AA:25][GG:22], US_Gujarati[AG:45][AA:26][GG:27], Luhya_Kenyan[AG:49][AA:27][GG:22], Yoruba-60-trios[AG:50][AA:26][GG:22]                                                    |
| chr16      | rs31042    | 6                | CEPH-60-trios[AG:50][AA:25][GG:23], Han_Chinese[AG:45][AA:24][GG:30], Japanese[AG:46][AA:23][GG:30], Luhya_Kenyan[AG:46][AA:25][GG:27], Italian[AG:50][AA:23][GG:26], Yoruba-60-trios[AG:48][AA:23][GG:27]                                                                |
| chr15      | rs12442655 | 6                | US_African-30-trios[CT:49][CC:28][TT:22], CEPH-60-trios[CT:45][CC:24][TT:30], Japanese[CT:48][CC:28][TT:23], US_Chinese[CT:51][CC:24][TT:24], US_Mexican-30-trios[CT:45][CC:23][TT:30], Italian[CT:46][CC:23][TT:29], Yoruba-60-trios[CT:52][CC:22][TT:25]                |
| chr14      | rs10140137 | 6                | US_African-30-trios[AG:46][AA:29][GG:23], US_Gujarati[AG:48][AA:24][GG:27], Japanese[AG:50][AA:24][GG:25], Luhya_Kenyan[AG:51][AA:24][GG:24], Maasai_Kenyan-60-trios[AG:49][AA:23][GG:27], Yoruba-60-trios[AG:51][AA:23][GG:25]                                           |
| chr14      | rs4905376  | 6                | US_African-30-trios[CT:53][CC:23][TT:23], CEPH-60-trios[CT:50][CC:22][TT:22], US_Gujarati[CT:45][CC:25][TT:28], US_Chinese[CT:45][CC:26][TT:27], Maasai_Kenyan-60-trios[CT:45][CC:25][TT:29]                                                                              |
| chr14      | rs1026504  | 6                | US_African-30-trios[AC:53][AA:23][CC:22], CEPH-60-trios[AC:48][AA:29][CC:22], US_Chinese[AC:50][AA:24][CC:25], Luhya_Kenyan[AC:53][AA:24][CC:22], Maasai_Kenyan-60-trios[AC:51][AA:23][CC:24], Italian[AC:50][AA:25][CC:23]                                               |
| chr19      | rs7250431  | 6                | US_African-30-trios[GT:45][GG:30][TT:23], CEPH-60-trios[GT:48][GG:24][TT:27], Han_Chinese[GT:46][GG:25][TT:28], US_Chinese[GT:47][GG:27][TT:25], Maasai_Kenyan-60-trios[GT:47][GG:29][TT:23], Yoruba-60-trios[GT:50][GG:22][TT:26]                                        |
| chr19      | rs273628   | 6                | US_African-30-trios[AG:47][AA:23][GG:28], US_Gujarati[AG:48][AA:28][GG:22], Japanese[AG:51][AA:23][GG:25], Luhya_Kenyan[AG:51][AA:24][GG:24], Maasai_Kenyan-60-trios[AG:46][AA:26][GG:26], Italian[AG:45][AA:25][GG:28]                                                   |
| chr18      | rs2287434  | 6                | US_African-30-trios[CT:47][CC:26][TT:25], CEPH-60-trios[CT:50][CC:24][TT:25], Han_Chinese[CT:45][CC:23][TT:31], US_Chinese[CT:47][CC:22][TT:30], Italian[CT:46][CC:29][TT:23], Yoruba-60-trios[CT:50][CC:23][TT:25]                                                       |
| chr18      | rs8096468  | 6                | CEPH-60-trios[CT:49][CC:27][TT:22], Han_Chinese[CT:51][CC:23][TT:24], US_Chinese[CT:47][CC:28][TT:24], Japanese[CT:47][CC:28][TT:24], US_Mexican-30-trios[CT:45][CC:22][TT:32], Italian[CT:49][CC:24][TT:25]                                                              |
| chr20      | rs165853   | 7                | US_African-30-trios[AC:50][AA:25][CC:23], CEPH-60-trios[AC:53][AA:23][CC:23], Han_Chinese[AC:48][AA:23][CC:25], Japanese[AC:48][AA:24][CC:26], US_Mexican-30-trios[AC:50][AA:25][CC:23], Italian[AC:46][AA:24][CC:28], Yoruba-60-trios[AC:47][AA:26][CC:25]               |
| chr22      | rs11698886 | 7                | CEPH-60-trios[AG:50][AA:26][GG:23], Han_Chinese[AG:46][AA:25][GG:28], US_Chinese[AG:52][AA:22][GG:24], US_Gujarati[AG:54][AA:22][GG:22], Japanese[AG:46][AA:23][GG:30], Luhya_Kenyan[AG:49][AA:26][GG:24], US_Mexican-30-trios[AG:50][AA:25][GG:23]                       |
| chr21      | rs9984703  | 5                | CEPH-60-trios[AG:46][AA:29][GG:24], US_Chinese[AG:47][AA:28][GG:24], US_Gujarati[AG:48][AA:28][GG:22], US_Mexican-30-trios[AG:47][AA:28][GG:23], Italian[AG:53][AA:23][GG:23]                                                                                             |
| chr21      | rs233621   | 5                | CEPH-60-trios[CT:45][CC:28][TT:24], US_Gujarati[CT:45][CC:27][TT:26], Japanese[CT:45][CC:29][TT:25], Italian[CT:50][CC:25][TT:23]                                                                                                                                         |
| chr21      | rs2823809  | 5                | CEPH-60-trios[AG:46][AA:30][GG:22], Luhya_Kenyan[AG:47][AA:28][GG:24], Maasai_Kenyan-60-trios[AG:50][AA:24][GG:25], Italian[AG:45][AA:29][GG:24], Yoruba-60-trios[AG:50][AA:24][GG:24]                                                                                    |
| chr21      | rs233622   | 5                | CEPH-60-trios[AG:46][AA:28][GG:22], US_Gujarati[AG:46][AA:28][GG:25], Japanese[AG:45][AA:29][GG:25], Italian[AG:50][AA:24][GG:24]                                                                                                                                         |
| chr21      | rs373037   | 5                | CEPH-60-trios[CT:45][CC:22][TT:32], Han_Chinese[CT:53][CC:23][TT:23], Japanese[CT:45][CC:26][TT:28], Luhya_Kenyan[CT:50][CC:26][TT:22], Maasai_Kenyan-60-trios[CT:48][CC:23][TT:27]                                                                                       |
| chr21      | rs9647139  | 5                | US_African-30-trios[AG:46][AA:26][GG:27], US_Gujarati[AG:54][AA:22][GG:22], Japanese[AG:47][AA:26][GG:25], Luhya_Kenyan[AG:54][AA:22][GG:22], Italian[AG:50][AA:25][GG:23]                                                                                                |
| chr21      | rs2837501  | 5                | CEPH-60-trios[CT:45][CC:24][TT:29], US_Chinese[CT:47][CC:24][TT:28], US_Gujarati[CT:48][CC:22][TT:28], US_Mexican-30-trios[CT:46][CC:25][TT:28], Italian[CT:53][CC:23][TT:23]                                                                                             |
| chr21      | rs4819214  | 5                | US_African-30-trios[AG:47][AA:25][GG:26], Luhya_Kenyan[AG:45][AA:24][GG:30], US_Mexican-30-trios[AG:47][AA:22][GG:29], Maasai_Kenyan-60-trios[AG:50][AA:26][GG:22], Italian[AG:46][AA:24][GG:24]                                                                          |
| chr21      | rs8130107  | 5                | US_African-30-trios[CT:49][CC:28][TT:22], US_Chinese[CT:49][CC:27][TT:23], US_Gujarati[CT:48][CC:27][TT:24], Japanese[CT:47][CC:23][TT:29], Yoruba-60-trios[CT:46][CC:27][TT:26]                                                                                          |
| chr21      | rs2009879  | 5                | Han_Chinese[CT:45][CC:28][TT:26], US_Chinese[CT:47][CC:22][TT:30], Japanese[CT:50][CC:27][TT:24], US_Mexican-30-trios[CT:49][CC:26][TT:23], Yoruba-60-trios[CT:48][CC:22][TT:28]                                                                                          |
| chr21      | rs362813   | 5                | US_African-30-trios[CT:47][CC:21][TT:29], US_Chinese[CT:50][CC:27][TT:22], US_Gujarati[CT:48][CC:26][TT:25], US_Mexican-30-trios[CT:47][CC:27][TT:29], Italian[CT:48][CC:23][TT:28]                                                                                       |
| chr7       | rs701286   | 6                | US_African-30-trios[AG:45][AA:22][GG:23], Han_Chinese[AG:48][AA:23][GG:28], US_Chinese[AG:46][AA:23][GG:30], Luhya_Kenyan[AG:48][AA:26][GG:25], US_Mexican-30-trios[AG:45][AA:25][GG:29], Yoruba-60-trios[AG:50][AA:25][GG:24]                                            |
| chr7       | rs2327628  | 6                | US_African-30-trios[CT:47][CC:25][TT:26], Han_Chinese[CT:48][CC:24][TT:22], US_Chinese[CT:50][CC:27][TT:22], US_Gujarati[CT:48][CC:26][TT:25], US_Mexican-30-trios[CT:47][CC:27][TT:29], Italian[CT:48][CC:23][TT:28]                                                     |
| chr7       | rs12216600 | 6                | CEPH-60-trios[CT:46][CC:25][TT:27], US_Chinese[CT:47][CC:25][TT:27], US_Mexican-30-trios[CT:45][CC:25][TT:29], Maasai_Kenyan-60-trios[CT:47][CC:25][TT:26], Italian[CT:51][CC:24][TT:23], Yoruba-60-trios[CT:48][CC:25][TT:23]                                            |
| chr7       | rs6962246  | 6                | US_African-30-trios[CT:49][CC:26][TT:22], CEPH-60-trios[CT:45][CC:30][TT:24], US_Chinese[CT:48][CC:27][TT:24], US_Gujarati[CT:45][CC:26][TT:27], Japanese[CT:48][CC:28][TT:23], Maasai_Kenyan-60-trios[CT:46][CC:30][TT:23]                                               |
| chr7       | rs2517478  | 6                | US_African-30-trios[GT:49][GG:25][TT:25], Han_Chinese[GT:48][GG:25][TT:25], Japanese[GT:48][GG:25][TT:25], Luhya_Kenyan[GT:50][GG:26][TT:22], Italian[GT:48][GG:24][TT:27], Yoruba-60-trios[GT:48][GG:23][TT:28]                                                          |
| chr6       | rs2523836  | 6                | US_African-30-trios[CT:50][CC:23][TT:25], Han_Chinese[CT:48][CC:25][TT:25], Japanese[CT:50][CC:26][TT:22], Italian[CT:48][CC:24][TT:27], Yoruba-60-trios[CT:48][CC:23][TT:28]                                                                                             |
| chr6       | rs2523843  | 6                | US_African-30-trios[AG:50][AA:22][GG:26], Han_Chinese[AG:48][AA:25][GG:25], Japanese[AG:48][AA:25][GG:25], Luhya_Kenyan[AG:51][AA:25][GG:22], Italian[AG:48][AA:24][GG:27], Yoruba-60-trios[AG:48][AA:23][GG:28]                                                          |
| chr6       | rs2905759  | 6                | US_African-30-trios[CT:49][CC:25][TT:25], Han_Chinese[CT:48][CC:25][TT:25], Japanese[CT:48][CC:25][TT:25], Luhya_Kenyan[CT:50][CC:26][TT:22], Italian[CT:48][CC:24][TT:27], Yoruba-60-trios[CT:48][CC:23][TT:28]                                                          |
| chr6       | rs2523884  | 6                | US_African-30-trios[CT:45][CC:25][TT:25], Han_Chinese[CT:50][CC:25][TT:24], Japanese[CT:48][CC:25][TT:25], Luhya_Kenyan[CT:49][CC:27][TT:22], Italian[CT:48][CC:24][TT:27], Yoruba-60-trios[CT:46][CC:23][TT:30]                                                          |
| chr6       | rs2517489  | 6                | US_African-30-trios[AG:49][AA:25][GG:25], Han_Chinese[AG:50][AA:24][GG:25], Japanese[AG:48][AA:25][GG:25], Luhya_Kenyan[AG:49][AA:22][GG:27], Italian[AG:48][AA:27][GG:23], Yoruba-60-trios[AG:46][AA:30][GG:23]                                                          |
| chr6       | rs2256436  | 6                | US_African-30-trios[AG:50][AA:23][GG:25], Han_Chinese[AG:48][AA:25][GG:25], Japanese[AG:48][AA:25][GG:25], Luhya_Kenyan[AG:49][AA:27][GG:22], Italian[AG:48][AA:24][GG:27], Yoruba-60-trios[AG:46][AA:32][GG:30]                                                          |
| chr6       | rs2517477  | 6                | US_African-30-trios[AG:45][AA:25][GG:25], Han_Chinese[AG:48][AA:25][GG:25], Japanese[AG:48][AA:25][GG:25], Luhya_Kenyan[AG:50][AA:22][GG:26], Italian[AG:48][AA:27][GG:24], Yoruba-60-trios[AG:46][AA:28][GG:23]                                                          |
| chr6       | rs2523883  | 6                | US_African-30-trios[CT:48][CC:25][TT:25], Han_Chinese[CT:49][CC:25][TT:24], Japanese[CT:48][CC:25][TT:25], Luhya_Kenyan[CT:49][CC:27][TT:22], Italian[CT:47][CC:25][TT:27], Yoruba-60-trios[CT:46][CC:23][TT:30]                                                          |
| chr6       | rs2517502  | 6                | US_African-30-trios[CT:50][CC:23][TT:25], Han_Chinese[CT:50][CC:25][TT:24], Japanese[CT:48][CC:25][TT:25], Luhya_Kenyan[CT:49][CC:27][TT:22], Italian[CT:48][CC:24][TT:27], Yoruba-60-trios[CT:46][CC:30][TT:23]                                                          |
| chr6       | rs2523881  | 6                | US_African-30-trios[GT:49][GG:25][TT:25], Han_Chinese[GT:50][GG:24][TT:25], Japanese[GT:48][GG:25][TT:25], Luhya_Kenyan[GT:49][GG:22][TT:27], Italian[GT:48][GG:27][TT:24], Yoruba-60-trios[GT:46][GG:30][TT:23]                                                          |
| chr6       | rs2517500  | 6                | US_African-30-trios[CT:50][CC:23][TT:25], Han_Chinese[CT:50][CC:25][TT:24], Han_Chinese[CT:48][CC:25][TT:25], Luhya_Kenyan[CT:49][CC:27][TT:23], Italian[CT:48][CC:24][TT:27], Yoruba-60-trios[CT:46][CC:30][TT:23]                                                       |
| chr6       | rs154989   | 6                | US_African-30-trios[AG:50][AA:23][GG:30], CEPH-60-trios[AG:46][AA:26][GG:26], Han_Chinese[AG:47][AA:29][GG:23], US_Gujarati[AG:50][AA:22][GG:26], Japanese[AG:47][AA:25][GG:26], Italian[AG:49][AA:24][GG:25]                                                             |
| chr6       | rs2525311  | 6                | US_African-30-trios[AG:50][AA:23][GG:25], Han_Chinese[AG:48][AA:25][GG:25], Japanese[AG:48][AA:25][GG:25], Luhya_Kenyan[AG:50][AA:26][GG:22], Italian[AG:48][AA:24][GG:27], Yoruba-60-trios[AG:48][AA:23][GG:28]                                                          |
| chr6       | rs2535310  | 6                | US_African-30-trios[AC:51][AA:25][CC:22], Han_Chinese[AC:48][AA:25][CC:25], Japanese[AC:48][AA:25][CC:25], Luhya_Kenyan[AC:53][AA:22][CC:24], Yoruba-60-trios[AC:47][AA:23][CC:29]                                                                                        |
| chr6       | rs2106067  | 6                | US_African-30-trios[CT:45][CC:25][TT:24], Han_Chinese[CT:48][CC:25][TT:25], Japanese[CT:48][CC:25][TT:25], Luhya_Kenyan[CT:50][CC:22][TT:26], Italian[CT:48][CC:27][TT:24], Yoruba-60-trios[CT:48][CC:28][TT:23]                                                          |
| chr6       | rs2523891  | 6                | US_African-30-trios[CT:49][CC:25][TT:25], Han_Chinese[CT:50][CC:25][TT:24], Japanese[CT:48][CC:25][TT:25], Luhya_Kenyan[CT:49][CC:27][TT:22], Italian[CT:48][CC:24][TT:27], Yoruba-60-trios[CT:46][CC:23][TT:30]                                                          |
| chr6       | rs2535315  | 6                | US_African-30-trios[CT:51][CC:22][TT:25], Han_Chinese[CT:48][CC:25][TT:25], Japanese[CT:48][CC:25][TT:25], Luhya_Kenyan[CT:50][CC:26][TT:22], Italian[CT:48][CC:24][TT:27], Yoruba-60-trios[CT:48][CC:23][TT:28]                                                          |
| chr6       | rs154988   | 6                | US_African-30-trios[AG:45][AA:30][GG:23], CEPH-60-trios[AG:46][AA:26][GG:26], US_Gujarati[AG:47][AA:23][GG:29], US_Gujarati[AG:50][AA:26][GG:22], Japanese[AG:47][AA:26][GG:25], Italian[AG:49][AA:25][GG:24]                                                             |
| chr6       | rs154988   | 6                | US_African-30-trios[GT:50][GG:22][TT:26], CEPH-60-trios[GT:51][GG:22][TT:25], US_Gujarati[GT:51][GG:22][TT:25], US_Mexican-30-trios[GT:45][GG:29][TT:25], Maasai_Kenyan-60-trios[GT:45][GG:29][TT:25], Italian[GT:49][GG:24][TT:25], Yoruba-60-trios[GT:48][GG:23][TT:27] |
| chr5       | rs4958301  | 7                | US_African-30-trios[AT:54][AA:22][TT:29], CEPH-60-trios[AT:50][AA:22][TT:22], Han_Chinese[AT:51][AA:24][TT:24], US_Chinese[AT:47][AA:22][TT:30], US_Gujarati[AT:45][AA:27][TT:26], Japanese[AT:46][AA:30][TT:23]                                                          |
| chr4       | rs1521696  | 7                | US_African-30-trios[AT:45][AA:23][TT:29], CEPH-60-trios[AT:50][AA:22][TT:22], Han_Chinese[AT:51][AA:24][TT:24], US_Chinese[AT:47][AA:22][TT:30], US_Gujarati[AT:45][AA:27][TT:26], Japanese[AT:46][AA:30][TT:23]                                                          |
| chr4       | rs720      | 6                | US_African-30-trios[CT:45][CC:32][TT:22], CEPH-60-trios[CT:53][CC:23][TT:23], US_Chinese[CT:45][CC:24][TT:30], US_Gujarati[CT:46][CC:26][TT:26], Maasai_Kenyan-60-trios[CT:48][CC:28][TT:22], Italian[CT:48][CC:24][TT:27]                                                |
| chr4       | rs2160043  | 6                | US_African-30-trios[CT:45][CC:32][TT:22], CEPH-60-trios[CT:49][CC:23][TT:29], Han_Chinese[CT:47][CC:23][TT:29], US_Chinese[CT:45][CC:31][TT:22], Luhya_Kenyan[CT:45][CC:24][TT:30], Maasai_Kenyan-60-trios[CT:47][CC:28][TT:23]                                           |
| chr4       | rs6800661  | 6                | US_African-30-trios[AC:45][AA:32][CC:22], Han_Chinese[AC:46][AA:23][CC:30], US_Chinese[AC:51][AA:24][CC:24], US_Gujarati[AC:45][AA:24][CC:30], Japanese[AC:48][AA:26][CC:24], Maasai_Kenyan-60-trios[AC:49][AA:23][CC:26]                                                 |
| chr4       | rs744876   | 6                | US_African-30-trios[AG:45][AA:28][GG:25], US_Chinese[AG:52][AA:22][GG:24], Luhya_Kenyan[AG:45][AA:25][GG:24], Maasai_Kenyan-60-trios[AG:48][AA:23][GG:28], Italian[AG:45][AA:29][GG:24], Yoruba-60-trios[AG:49][AA:25][GG:25]                                             |
| chr4       | rs1450344  | 6                | US_African-30-trios[AG:50][AA:22][GG:26], Han_Chinese[AG:47][AA:25][GG:26], US_Chinese[AG:45][AA:24][GG:30], US_Gujarati[AG:51][AA:22][GG:25], US_Mexican-30-trios[AG:46][AA:25][GG:28], Yoruba-60-trios[AG:45][AA:30][GG:23]                                             |
| chr4       | rs4263316  | 6                | US_African-30-trios[CT:45][CC:22][TT:22], CEPH-60-trios[CT:48][CC:25][TT:26], US_Gujarati[CT:50][CC:24][TT:25], Luhya_Kenyan[CT:49][CC:26][TT:24], US_Mexican-30-trios[CT:47][CC:26][TT:25], Yoruba-60-trios[CT:47][CC:26][TT:25]                                         |
| chr3       | rs499632   | 6                | US_African-30-trios[AG:45][AA:22][GG:32], Han_Chinese[AG:46][AA:30][GG:23], US_Chinese[AG:51][AA:24][GG:24], US_Gujarati[AG:45][AA:30][GG:24], Japanese[AG:48][AA:24][GG:26], Maasai_Kenyan-60-trios[AG:49][AA:26][GG:23]                                                 |
| chr3       | rs4073109  | 6                | Han_Chinese[CT:51][CC:23][TT:24], US_Chinese[CT:47][CC:22][TT:30], US_Gujarati[CT:45][CC:26][TT:28], Luhya_Kenyan[CT:45][CC:28][TT:25], US_Mexican-30-trios[CT:49][CC:28][TT:22], Yoruba-60-trios[CT:50][CC:26][TT:22]                                                    |
| chr3       | rs7609911  | 6                | Han_Chinese[AC:48][AA:25][CC:25], US_Chinese[AC:51][AA:22][CC:25], Luhya_Kenyan[AC:45][AA:27][CC:26], US_Mexican-30-trios[AC:53][AA:23][CC:22], Maasai_Kenyan-60-trios[AC:49][AA:27][CC:23], Italian[AC:45][AA:29][CC:24]                                                 |
| chr3       | rs1170939  | 6                | Han_Chinese[AG:47][AA:26][GG:25], US_Chinese[AG:50][AA:25][GG:24], Japanese[AG:48][AA:28][GG:23], Luhya_Kenyan[AG:49][AA:25][GG:25], Maasai_Kenyan-60-trios[AG:45][AA:25][GG:28], Italian[AG:45][AA:24][GG:29]                                                            |
| chr3       | rs6437577  | 6                | US_African-30-trios[AC:53][AA:32][CC:22], CEPH-60-trios[AC:48][AA:25][CC:26], US_Gujarati[AC:50][AA:24][CC:25], Luhya_Kenyan[AC:49][AA:26][CC:24], US_Mexican-30-trios[AC:47][AA:26][CC:25], Yoruba-60-trios[AC:47][AA:26][CC:25]                                         |
| chr3       | rs1686391  | 6                | Han_Chinese[GT:53][GG:23][TT:23], Japanese[GT:50][GG:26][TT:23], Luhya_Kenyan[GT:48][GG:22][TT:28], US_Mexican-30-trios[GT:46][GG:30][TT:22], Maasai_Kenyan-60-trios[GT:50][GG:23][TT:26], Yoruba-60-trios[GT:50][GG:22][TT:26]                                           |
| chr3       | rs7616178  | 6                | US_African-30-trios[CT:47][CC:28][TT:23], CEPH-60-trios[CT:48][CC:23][TT:28], Han_Chinese[CT:48][CC:25][TT:26], US_Gujarati[CT:46][CC:24][TT:29], Luhya_Kenyan[CT:47][CC:28][TT:24], US_Mexican-30-trios[CT:47][CC:28][TT:23]                                             |
| chr3       | rs1263456  | 6                | US_African-30-trios[AG:45][AA:32][GG:22], Han_Chinese[AG:46][AA:23][GG:30], US_Chinese[AG:51][                                                                                                                                                                            |

Table S7

Table S7. Primers for the SNPs in HapMap sequenom assay

| WELL | SNP_ID     | 1st-PCR Primer                  | 2nd-PCR Primer                  | Extension Primer           |
|------|------------|---------------------------------|---------------------------------|----------------------------|
| W1   | rs12541274 | ACGTTGGATGAGAGCAGGCCATCGAGA     | ACGTTGGATGACCTTTACAAGGCTCGCAC   | CTCACTCTTCTGGCT            |
| W1   | rs10102929 | ACGTTGGATGAGGAAGGTGGTCATAGTTTC  | ACGTTGGATGAAGCCCGTAAGTCTATGAGG  | AGTCTATGAGGGATCCA          |
| W1   | AMELXY.a   | ACGTTGGATGCACTGGGATGTGGTGATGAG  | ACGTTGGATGGGCTGCACCACCAATCATC   | CCACCAATCATCCCGTG          |
| W1   | rs6645103  | ACGTTGGATGCCACCACTGCTCACATAATC  | ACGTTGGATGACTTTTCTGACAGTGCAGCC  | GCCTGCAGATAACATCTAA        |
| W1   | rs10899035 | ACGTTGGATGCTCTCTCCATGCCTTTTAC   | ACGTTGGATGAAAATGGAGTAGTACAGGC   | GGAGTAGTACAGGCATAAAA       |
| W1   | rs7297243  | ACGTTGGATGGGCTAACATTTTAACTCAGG  | ACGTTGGATGCTCTTAGACTGACAAAATGC  | TGACAAAATGCTTTATCTTT       |
| W1   | rs4958301  | ACGTTGGATGGCTATTTGATAGACCAGGTG  | ACGTTGGATGCTCTGACCCTTCTCAAAC    | CACTACACTCTAATCCAAGCTA     |
| W1   | rs744876   | ACGTTGGATGAGAAGCATGCACATTCAGGG  | ACGTTGGATGAGTGCCTGTATGGGTGTG    | GGTGGCTAGTCTCAATATGG       |
| W1   | rs2433651  | ACGTTGGATGGTTGCCTGAGATACGTTTTCG | ACGTTGGATGATGCAGGACCTTCTCTATG   | CAGGACCTTCTCTATGTCG        |
| W1   | rs2535310  | ACGTTGGATGTCATGTGCTGGATCCAAGG   | ACGTTGGATGGCTGCTTGAACAGAGACAC   | ACACAAAATGCACTGGTTAAAT     |
| W1   | rs11698886 | ACGTTGGATGGCGCACAGGAGTTTCCAG    | ACGTTGGATGGGCATGCCACACAGGCAG    | GGCATGCCACACAGGCAGAGAGAA   |
| W1   | rs1624525  | ACGTTGGATGTTTTAATTAGGAGAAGCAG   | ACGTTGGATGAATGAGGATCCAAACAGTCT  | GCTGCACAAAATATCTCTCAACCACA |
| W2   | rs120434   | ACGTTGGATGAGGGAGCCAGTTGGCAACAT  | ACGTTGGATGGCCTTCAATGCCCTGTTC    | TGTGCTGGAATGCTGAT          |
| W2   | rs233621   | ACGTTGGATGTGGAAAGCTGGAGGCCAAG   | ACGTTGGATGTTTTCTTGGTTCTCAGGGC   | CTCAGTCTAGATCCACAA         |
| W2   | rs701286   | ACGTTGGATGGGAAAGCTGCAGGAATTG    | ACGTTGGATGGGAAAGTATAGCACAAAAGC  | GCAAAGACAAAATGGGAGA        |
| W2   | rs10140137 | ACGTTGGATGCGGCAAACTCTGTTTCTATG  | ACGTTGGATGTAACAAAATGTTTTATGTC   | TTAGTCTTAAATGATCCCCA       |
| W2   | rs2051068  | ACGTTGGATGCTGGAAACCAATTCAGAATGC | ACGTTGGATGCTGAAGGTAAGATTCAAAG   | TCAAAGGCGCACAGGTATAG       |
| W2   | rs1365740  | ACGTTGGATGGTACTTACTCTGAGGTAG    | ACGTTGGATGCAGCACTGGGATGACTTACA  | TACACCTTTTCTCTTCTT         |
| W2   | rs1434199  | ACGTTGGATGCCTCTGCCCTTAATTTCTT   | ACGTTGGATGTAGGAGCTGAATCAATAC    | AGCTGAATCAATACATATCACT     |
| W2   | rs2419407  | ACGTTGGATGAACCTGACAAGTCAAGTCTGC | ACGTTGGATGTCTCAGTCTTTCAGAGAG    | AGTCTTTCAGAGAGTTGATCAT     |
| W2   | rs273628   | ACGTTGGATGGGAAATGTTTTGTCAGTGTCT | ACGTTGGATGCTCATGGATAAATACTGGG   | GTGAAAATGCTGGATCATAGGA     |
| W2   | rs6800661  | ACGTTGGATGCTGTAAGTGTTTAATAG     | ACGTTGGATGTAATCTTCTCCAAATGC     | AATCTTCTCCAAATGCAAGGTTT    |
| W2   | rs31042    | ACGTTGGATGATTACCTGGGCATTGTTTCC  | ACGTTGGATGGTTCAGAAGTATTCAGGCAC  | GACACATTTACCAAGTGAAGGCT    |
| W2   | rs1026504  | ACGTTGGATGCTCCATTTTGACCTTGATCC  | ACGTTGGATGCCATTTACTCTGTGCAGCAT  | TGCAGCATGATTAGAAAGTAAAGGA  |
| W3   | rs8096468  | ACGTTGGATGTCACTCATCCACATGGCAGG  | ACGTTGGATGAGCACAGCGCACCAACCA    | CCTGGGCTGAGCAACCA          |
| W3   | rs2619118  | ACGTTGGATGTCTGTCTCCAGCTACACT    | ACGTTGGATGACCTGGGAGACGCGAAAGGA  | GCGAAAGGAGGAAATGC          |
| W3   | rs2287434  | ACGTTGGATGGGTTAAAGGGACTCCATCAG  | ACGTTGGATGGGTAAGACAATTTTGGC     | ACAATTTGGCAAGACTG          |
| W3   | rs362813   | ACGTTGGATGGTCTTCCAATGTCTGTCTC   | ACGTTGGATGCAGCCATCACTACCATCATC  | TCAAAAACACTATTCTGCC        |
| W3   | rs265005   | ACGTTGGATGAGCCTCTCTGCTAAGCTACA  | ACGTTGGATGTTGTTGTCTGTCTCACTGG   | aTGCTCACTGGACTATAAAA       |
| W3   | rs9573824  | ACGTTGGATGCTAAGGCATCTGGCAGTA    | ACGTTGGATGAAAGCATTATAGTTGGGAGG  | AAAACAAACAGGGTAGCAAG       |
| W3   | rs11103233 | ACGTTGGATGATAAACCAATTGCCATCGAAG | ACGTTGGATGAGGAACTCACGGGAGGACAA  | TGGGCTTTGCTTACTACTC        |
| W3   | rs1521696  | ACGTTGGATGTTCACTGATTCACCTGTTCC  | ACGTTGGATGGTCTAGGAATCTTCCAAATG  | TAGATTTGGACTTTAAGCAATC     |
| W3   | rs2347790  | ACGTTGGATGATGCTCCACCCACACAGTTC  | ACGTTGGATGATAACCTATGCAACAGCTGG  | gTGGAAAGATGTGCGTATGCCCTTA  |
| W3   | rs7250431  | ACGTTGGATGGAGAAAAGGATGCTGCTC    | ACGTTGGATGACTTCTCTGGCTCTATGC    | GGGCTGGTCCACCTCTGCTCA      |
| W3   | rs12136079 | ACGTTGGATGTGGAAAACGGAAGAAAGTG   | ACGTTGGATGTTCTGGAACTCTGCTATTC   | TATTCAAATAAACTGGCTGTTA     |
| W3   | rs1335143  | ACGTTGGATGATACTTATGTCCAAGGCAA   | ACGTTGGATGCTTCTTATCCATAAATATCCC | TGCAAAAATACATTTATGATCTTTA  |
| W4   | rs154989   | ACGTTGGATGATTGCAACCATCGAGAGGAC  | ACGTTGGATGTTCCCTTGTATCTCTGGC    | TCGCATGACATCAGGCT          |
| W4   | rs165583   | ACGTTGGATGCCCTTCCCTGAACAGAAAGC  | ACGTTGGATGCTCCCGTGGTTTTATAGCAG  | GGCGAAGGAAAGGAGACC         |
| W4   | rs630706   | ACGTTGGATGGTATCTAGCATTATCGAGAC  | ACGTTGGATGCACAAAATGATGCTCCCC    | ATGCTCCCCATTTACTTA         |
| W4   | rs12442455 | ACGTTGGATGATATGTCACGCATAGCCCGAG | ACGTTGGATGAACCTGGCTCATGGATGACA  | AGTGGATTATCCTTGGAAAT       |
| W4   | rs2160043  | ACGTTGGATGAGTATTGACAAGGATGTGG   | ACGTTGGATGGTTTTCCAAAGTAGCTACAG  | CAATTTATATCTACCAGCA        |
| W4   | rs4617924  | ACGTTGGATGCTGCTGGTACCTGAAAATTC  | ACGTTGGATGGCAGTTATGTGTACATTAG   | ATTTAGACTGAGTTTTGCTT       |
| W4   | AMELXY.b   | ACGTTGGATGACCACCAATCATCCCGCTG   | ACGTTGGATGAGCTGGCACCCTGGGATGT   | ACCACCTGGATGTGGTGTAGG      |
| W4   | rs9928312  | ACGTTGGATGTAGTTCAGATCCCACTGGC   | ACGTTGGATGAAAAGCGGTGGCCAGGAGTG  | GGCACAGGATGGCCCAAAGCAT     |

# Table S8

**Table S8. Cross-validation of MS based genetic fingerprinting assay**

| Sample   | Call Type                 | rs2287434 | rs4617924 | rs265005 | rs11698886 | rs1521696 | rs120434 | rs6800661 |
|----------|---------------------------|-----------|-----------|----------|------------|-----------|----------|-----------|
| ARO      | SNPchip Haplotype         | Hom1      | Hom1      | Hom2     | Hom1       | NoCall    | Het      | Hom1      |
|          | MS-Genetic fingerprinting | TT        | AA        | TT       | GG         | TT        | GC       | CC        |
| HT29     | SNPchip Haplotype         | Hom1      | Hom1      | Hom2     | Hom1       | Het       | NoCall   | Hom1      |
|          | MS-Genetic fingerprinting | TT        | AA        | TT       | GG         | TT        | GC       | CC        |
| 8305c    | SNPchip Haplotype         | Hom2      | Het       | Hom2     | Hom1       | Het       | Hom2     | Hom1      |
|          | MS-Genetic fingerprinting | CT        | CA        | TT       | GG         | AT        | GG       | CA        |
| BHP10_3  | SNPchip Haplotype         | Het       | Hom1      | Hom2     | Het        | Hom2      | Hom2     | Het       |
|          | MS-Genetic fingerprinting | CT        | AA        | TT       | GA         | TT        | GG       | CA        |
| BHP18_21 | SNPchip Haplotype         | Het       | Hom1      | Hom2     | Het        | Hom2      | Hom2     | Het       |
|          | MS-Genetic fingerprinting | CT        | AA        | TT       | GA         | TT        | GG       | CA        |
| BHP2_7   | SNPchip Haplotype         | Het       | Hom1      | Hom2     | Het        | Hom2      | Hom2     | NoCall    |
|          | MS-Genetic fingerprinting | CT        | AA        | TT       | GA         | TT        | GG       | CA        |
| BHP7_13  | SNPchip Haplotype         | Het       | Hom1      | Hom2     | Het        | Hom2      | Hom2     | Het       |
|          | MS-Genetic fingerprinting | CT        | AA        | TT       | GA         | TT        | GG       | CA        |
| DRO      | SNPchip Haplotype         | NoCall    | Hom1      | Hom2     | Hom1       | Hom1      | NoCall   | Het       |
|          | MS-Genetic fingerprinting | CT        | AA        | TT       | GG         | AA        | GG       | CA        |
| KAK-1    | SNPchip Haplotype         | Hom1      | Hom1      | Hom2     | Hom1       | NoCall    | Het      | Hom1      |
|          | MS-Genetic fingerprinting | TT        | AA        | TT       | GG         | TT        | NoCall   | CC        |
| KAT-10   | SNPchip Haplotype         | Hom1      | Hom1      | Hom2     | Hom1       | Hom2      | Het      | Hom1      |
|          | MS-Genetic fingerprinting | TT        | AA        | TT       | GG         | TT        | NoCall   | CC        |
| KAT-18   | SNPchip Haplotype         | Hom2      | Het       | Hom2     | NoCall     | NoCall    | Hom2     | Hom1      |
|          | MS-Genetic fingerprinting | CC        | CA        | TT       | GG         | AT        | GG       | CC        |
| KAT-4    | SNPchip Haplotype         | NoCall    | Hom1      | Hom2     | Hom1       | NoCall    | Het      | Hom1      |
|          | MS-Genetic fingerprinting | TT        | AA        | TT       | GG         | TT        | NoCall   | CC        |
| KAT-5    | SNPchip Haplotype         | Hom1      | Hom1      | Hom2     | Hom1       | Hom2      | Het      | Hom1      |
|          | MS-Genetic fingerprinting | TT        | AA        | TT       | GG         | TT        | NoCall   | CC        |
| KAT-50   | SNPchip Haplotype         | Hom1      | Hom1      | Hom2     | Hom1       | Hom2      | Het      | Hom1      |
|          | MS-Genetic fingerprinting | TT        | AA        | TT       | GG         | TT        | NoCall   | CC        |
| KAT-7    | SNPchip Haplotype         | Hom1      | Hom1      | Hom2     | Hom1       | Hom2      | Het      | Hom1      |
|          | MS-Genetic fingerprinting | TT        | AA        | TT       | GG         | TT        | NoCall   | CC        |
| NPA      | SNPchip Haplotype         | Het       | Hom1      | Het      | Hom2       | Hom1      | Het      | Het       |
|          | MS-Genetic fingerprinting | NoCall    | AA        | CT       | AA         | AA        | GC       | CA        |

Hom1=homozygous for allele 1; Hom2=homozygous for allele 2; Het=heterozygous

# Table S9

**Table S9. HapMap for cell line identity typing.**

| Cell Lines            | Match    | P Value  |
|-----------------------|----------|----------|
| *SW620                | SW480    | 3.97E-11 |
| §LS174T               | LS180    | 7.73E-06 |
| #DLD-1                | HCT-8    | 1.08E-12 |
| #HCT-15               | DLD-1    | 2.06E-05 |
| <sup>α</sup> COLO-201 | COLO-205 | 1.18E-12 |
| <sup>β</sup> IS1      | IS2      | 4.83E-08 |
| <sup>‡</sup> HT-29    | WiDr     | 9.81E-06 |
| <sup>¶</sup> C2BBe1   | Caco-2   | 5.74E-08 |
| RKO-ATCC              | RKO      | 6.24E-14 |

\*SW480 developed from primary and SW620 established at 6 months follow-up from lymph node metastasis of the same patient (Leibovitz et al., & Gagos et al., PMID: 1000501 & 7763008)

§ LS174T is a trypsinized variant of LS180 cell line (Tom et al., PMID: 1262041)

# Using DNA fingerprinting, these four cell lines found to have an identical genetic background (Vermeulen et al., & Chen et al., PMID:7621404 & 9809040)

<sup>α</sup> Tumor cell lines (COLO 201 and COLO 205) have been established from ascites fluid obtained from a male patient with adenocarcinoma of the colon (Semple et al., PMID:565251)

<sup>β</sup> Cell lines developed from a single patient (Cajot et al., PMID:9205061)

<sup>‡</sup> Chromosomal and isozymic evidence indicating that WiDr is a derivative of HT-29 (chen at al., PMID:3472642)

<sup>¶</sup> Clone derived from Caco-2 (Peterson et al., PMID: 1506435)
